**S4 Table. Average percentage of species' ranges captured in additional PAs including existing PAs scenarios. Second sensitivity analysis using the same species range conservation target to all species.**

| Scenario     | Species range conservation target | Boundary length modifier | % of PAs to total land area | Mean % of all species' ranges inside | Mean % of endangered species' ranges inside | Mean % of endemic species' ranges inside | Mean % of biological resource species' ranges inside |
|--------------|-----------------------------------|--------------------------|-----------------------------|--------------------------------------|---------------------------------------------|------------------------------------------|------------------------------------------------------|
| Same targets | 10% of all species                | 0.0007                   | 15.4                        | 16.9                                 | 30.0                                        | 22.4                                     | 20.8                                                 |
|              |                                   |                          | 16.6                        | 18.2                                 | 31.8                                        | 23.9                                     | 22.3                                                 |
|              | 15% of all species                | 0.0007                   | 15.3                        | 16.8                                 | 30.2                                        | 22.4                                     | 20.8                                                 |
|              |                                   |                          | 17.0                        | 18.5                                 | 32.4                                        | 24.3                                     | 22.7                                                 |
|              | 20% of all species                | 0.0007                   | 14.3                        | 15.6                                 | 28.7                                        | 21.1                                     | 19.5                                                 |
|              |                                   |                          | 16.8                        | 18.4                                 | 32.0                                        | 24.1                                     | 22.5                                                 |
|              | 25% of all species                | 0.0007                   | 13.7                        | 14.9                                 | 27.6                                        | 20.2                                     | 18.7                                                 |
|              |                                   |                          | 16.9                        | 18.4                                 | 32.1                                        | 24.1                                     | 22.5                                                 |
|              | 30% of all species                | 0.0007                   | 13.3                        | 14.4                                 | 26.9                                        | 19.6                                     | 18.2                                                 |
|              |                                   |                          | 16.9                        | 18.4                                 | 31.6                                        | 23.9                                     | 22.4                                                 |
